# Supplementary material for: mNGS improves the efficiency of infection diagnosis and treatment in acute-on-chronic liver failure
Source: Research Square preprint supplement (doi:10.21203/rs.3.rs-5029033/v1), 2025-10-31
Supplement: Supplementary file 1 [file 8f755ebaa07577cec67ca1cd.docx]

Table 1. Baseline characteristics of the study population.

|  |  | PSM(n=172) | | |  | RAW(n=275) | | |
| --- | --- | --- | --- | --- | --- | --- | --- | --- |
|  |  | mNGS Group  （n=86） | no-mNGS  （n=86） | P value |  | mNGS Group  （n=86） | no-mNGS  （n=189） | P value |
| Age (years) |  | 48.5±13.2 | 48.7±12.9 | 0.680 |  | 49(40.5-58.25) | 45(37-55) | 0.179 |
| Male, n(%) |  | 62(72.1%) | 54(62.8%） | 0.193 |  | 62(72.1) | 139(73.5) | 0.801 |
| Etiology |  |  |  | 0.995 |  |  |  | 0.08 |
| HBV |  | 42(48.8) | 41(47.7) |  |  | 41(47.7) | 127(67.2) |  |
| Alcohol |  | 10(11.6) | 11(12.8) |  |  | 11(12.8) | 11(5.8) |  |
| Autoimmune liver disease |  | 10(11.6) | 10(11.6) |  |  | 10(11.6) | 11(5.8) |  |
| Drug |  | 7(8.1) | 6(7.0) |  |  | 6(7.0) | 9(4.8) |  |
| others |  | 17(19.8%) | 18(20.9) |  |  | 18(20.9) | 31(16.4) |  |
| Complications |  |  |  |  |  |  |  |  |
| Ascites, n (%) |  | 28 (32.6) | 25(29.1) | 0.620 |  | 28(32.6) | 53(28.0) | 0.446 |
| Gastrointestinal bleeding, n (%) |  | 5(5.8%) | 5(5.8%) | 1.000 |  | 5(5.8) | 6(3.2) | 0.482 |
| Hepatic encephalopathy, n (%) |  | 12(14.0%) | 9(10.5%) | 0.485 |  | 12(14.0) | 12(6.3) | 0.038 |
| Laboratory data |  |  |  |  |  |  |  |  |
| Hemoglobin (g/L) |  | 108.2±25.1 | 108.15±25.9 | 0.777 |  | 106.0(92.8-127.0) | 122.0(102.5-137.5) | 0.001 |
| Platelet (×10 ^9/L) |  | 76.5(51.0-144.8) | 76.5(54.0-106.8) | 0.900 |  | 76.5(51.0-144.8) | 86.0(56.0-127.5) | 0.604 |
| Leukocytes count (×10^9 /L) |  | 7.3(5.4-10.4) | 6.8(4.8-10.1) | 0.258 |  | 7.3(5.4-15.2) | 6.3(4.5+12.2) | 0.005 |
| Lymphocyte count(×10^9 /L) |  | 0.88(0.53-1.38) | 0.98(0.65-1.41) | 0.163 |  | 0.88(0.52-1.39) | 0.96(0.64-1.40) | 0.179 |
| Neutrophil percentage(%) |  | 77.3(67.7-84.2) | 74.1(66.1-82.9) | 0.111 |  | 77.3(67.7-84.2) | 74.1(64.9-80.9) | 0.016 |
| C-reactive protein (mg/L) |  | 11.8(8.5-21.5) | 11.5(5.4-21.2) | 0.167 |  | 11.8(8.5-21.6) | 10.4(5.5-19.2) | 0.19 |
| PCT (ug/mL) |  | 0.59(0.32-1.15) | 0.55(0.30-1.02) | 0.484 |  | 0.59(0.32-1.15) | 0.53(0.32-0.95) | 0.424 |
| ALT(U/L) |  | 90(38.5-235.5) | 77.5(32-401) | 0.570 |  | 90(38.3-241.8) | 167(56-551.50) | 0.028 |
| AST(U/L) |  | 102.5(54.5-194.0) | 98.5(55.0-328.0) | 0.904 |  | 102.5(54.3-196.0) | 148(63.0-419.0) | 0.02 |
| Total Bilirubin (μmol/L) |  | 295.4(182.6-448.4) | 321.9(191.9-428.2) | 0.660 |  | 295.4(181.6-455.1) | 325(206.4-428.4) | 0.743 |
| ALB (g/L) |  | 28.9(26.6-32.8) | 29.8(26.1-35.1) | 0.476 |  | 28.9(26.5-32.8) | 30.4(27.4-35.0) | 0.067 |
| PTA(%) |  | 42.0(31.0-50.6) | 37.7(28.0-47.0) | 0.094 |  | 42.0(31.0-50.8) | 38.0(2.1-48.2) | 0.111 |
| INR |  | 1.83(1.5-2.4) | 2.01(1.65-2.70) | 0.059 |  | 1.8(1.5-3.1) | 2.0(1.6-2.6) | 0.101 |
| Serum creatinine (μmol/L) |  | 65.5(48.0-1.03) | 56.0(44.0-81.0) | 0.164 |  | 65.5(48.0-104.5) | 58.0(46.0-75.0) | 0.144 |
| MELD score |  | 27(22.25-31.75) | 27(22-30) | 0.626 |  | 27(22.25-31.75) | 26(23-30) | 0.223 |
| ALSS therapy |  | 48(55.8%) | 51(59.3%) | 0.643 |  | 51(59.3) | 108(57.1) | 0.737 |

Table 2. The clinical impact of mNGS on diagnosis and treatment

| Category | Clinical Impact | Grade | Description |  |
| --- | --- | --- | --- | --- |
| Case number, n(%) |
| Etiological Diagnosis | Positive | D1 | mNGS result was quicker than culture | 4(3.0%) |
| D2 | Co-infection was diagnosed according to mNGS. | 13(9.7%) |
| D3 | The detection time window was longer than that for culture | 0(0.0%) |
| D4 | Plasma mNGS results contributed to pathogen identification | 42(31.3%) |
| No effect | D5 | Negative result of mNGS | 31(23.1%) |
| D6 | The pathogen detected by mNGS was the same as culture, but not detected earlier than culture. | 5(3.7%) |
| D7 | The microbes detected by mNGS were assessed as unlikely pathogens. | 33(24.6%) |
| Negative | D8 | BSI pathogen was undetected by mNGS and without suspected pathogen detection | 6(4.5%) |
| Treatment | Positive | M1 | Initialization of the appropriate antibiotics treatment | 28(20.9%) |
| M2 | Antibiotic escalation | 2(1.5%) |
| M3 | Antibiotic de-escalation | 1(0.7%) |
| M4 | Confirmed empirical treatment | 12(9.0%) |
| No effect | M5 | No adjustment in treatment while the result was positive | 60(44.8%) |
|  | M6 | The patient was discharged or dead | 0(0.0%) |
| M7 | No adjustment in treatment while the result was negative | 31(23.1%) |
| Negative | M8 | mNGS led to unnecessary treatment | 0(0.0%) |
